# Supplementary material for: Preparation of transmittance-switchable composites from a coexistent system of polymer-dispersed and polymer-stabilized cholesteric liquid crystals
Source: Royal Society of Chemistry journal article supplement (doi:10.1039/d2cp01963a), 2022-01-01
Supplement: d2cp01963a1.pdf [file d2cp01963a1.pdf]

## Support information

# Preparation of transmittance-switchable composites from a coexistent system of polymer-dispersed and polymer-stabilized cholesteric liquid crystals

*Huimin Zhang<sup>a</sup>, Jie Liu<sup>a</sup>, Shiyan Gao<sup>a</sup>, Fei Li<sup>c</sup>, Cheng Ma<sup>a</sup>, Zongcheng Miao<sup>c\*\*</sup>, Wenbo Shen<sup>b\*</sup>*

<sup>a</sup>Xi'an Key Laboratory of Advanced Photo-electronics Materials and Energy  
Conversion Device, School of Electronic Information, Xijing University, Xi'an 710123,  
P. R. China

<sup>b</sup>Research Center for Humanoid Sensing, Zhejiang Laboratory, Hangzhou, 311100,  
People's Republic of China

<sup>c</sup>Xi'an Manareco New Materials Co Ltd, Xi'an 710077, P. R. China

<sup>d</sup>School of Artificial Intelligence, Optics and Electronics (iOPEN), Northwestern  
Polytechnical University, Xi'an 710072, Shaanxi, P.R. China

\* Corresponding Authors: Wenbo Shen: [swb0204@163.com](mailto:swb0204@163.com);

\*\* Corresponding Authors: Zongcheng Miao: [miaozongcheng@nwpu.edu.cn](mailto:miaozongcheng@nwpu.edu.cn);

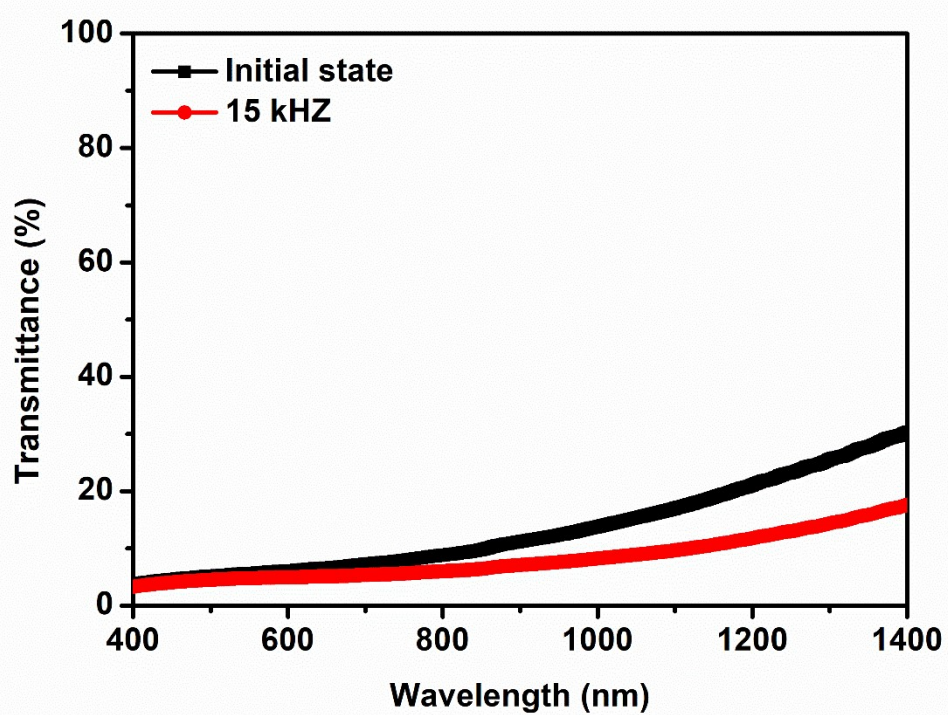

**Figure S1.** Transmission spectra of sample A6 at the initial state and under the high-frequency electric field (15 kHz, 100 V).

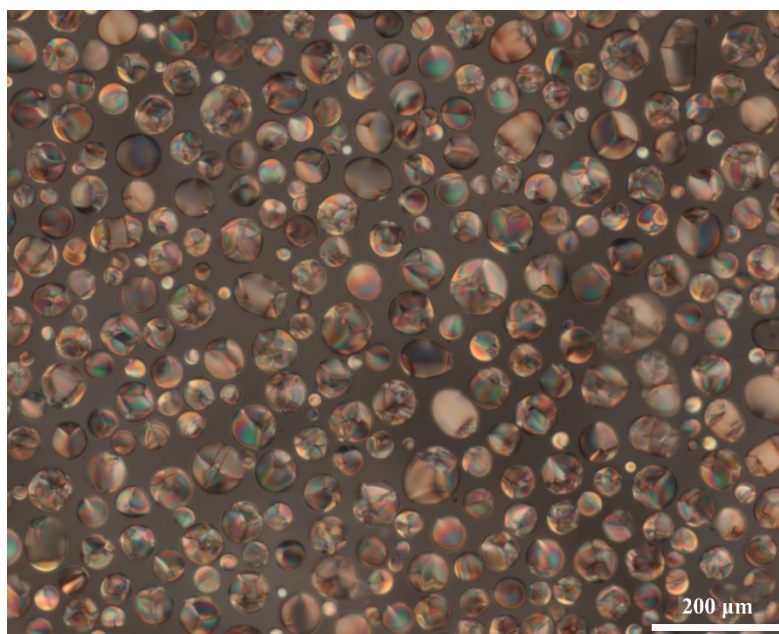

**Figure S2.** POM images of sample A3 before the polymerization.

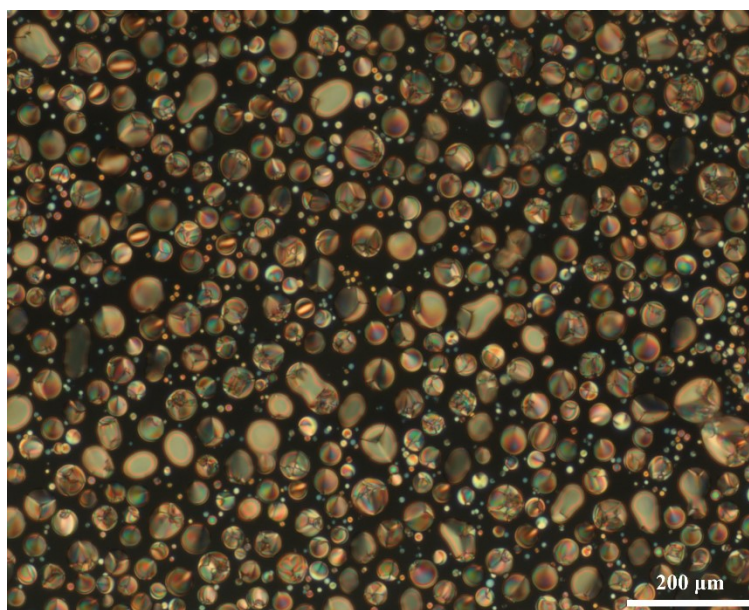

**Figure S3.** POM images of sample B before the polymerization.

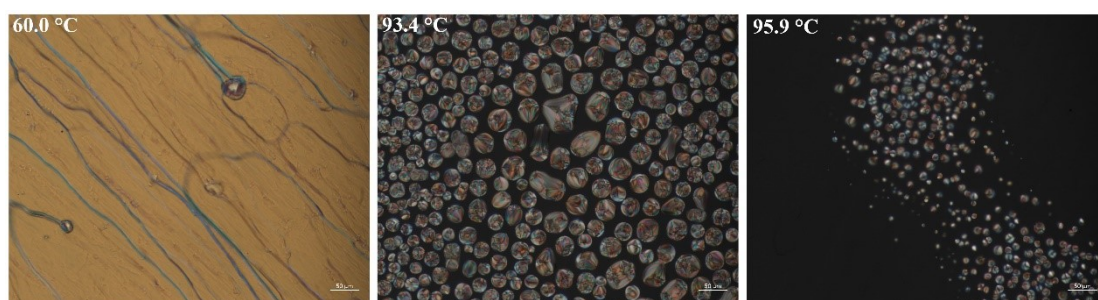

**Figure S4.** POM images of the pure CLCs at different temperatures.

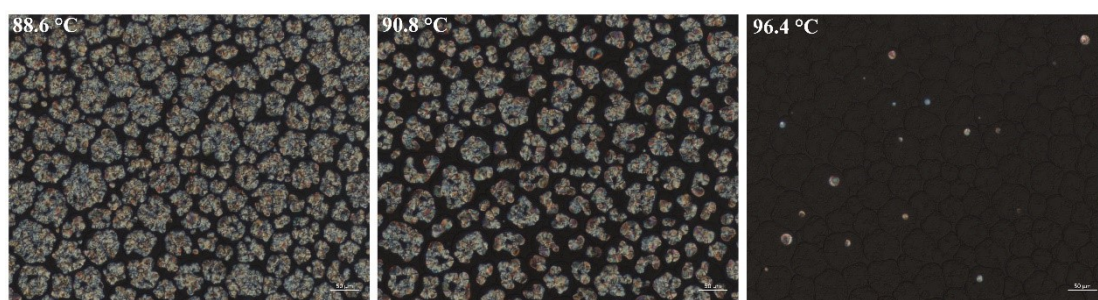

**Figure S5.** POM images of sample A3 at different temperatures.

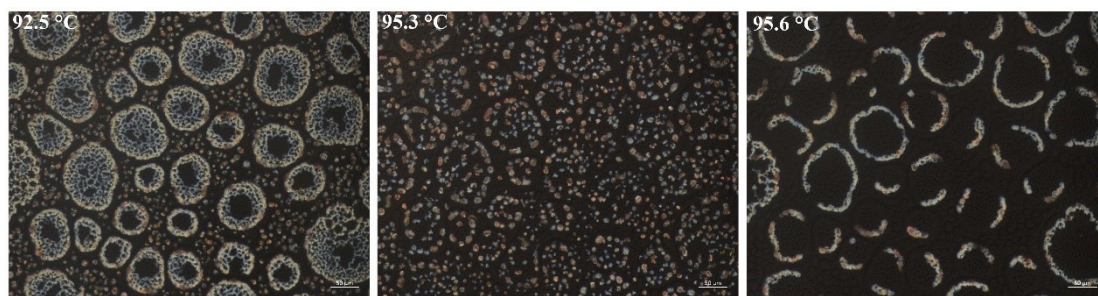

**Figure S6.** POM images of sample B2 at different temperatures.

The POM images of different samples at various temperatures are given in Figures S4-S6. It can be found that the planar texture of the pure CLCs is damaged when the temperature rises to 93.4 °C. Some regions in the POM images of sample A3 also change from a bright state to a dark state at 90.8 °C, suggesting that the temperature induces the phase transition from the anisotropic state to the isotropic state of the LCs in these regions. At 92.5 °C, the center of some LC droplets in sample B2 still presents a bright state. By comparison, it can be concluded that the mesogenic polymer network is conducive to stabilizing the arrangement of the LCs.
